# Supplementary material for: Development and evaluation of an intervention based on the provision of patient feedback to improve patient safety in Spanish primary healthcare centres: study protocol
Source: PubMed Central journal article supplement — BMJ Open. 2019 Dec 23;9(12):e031367. doi: 10.1136/bmjopen-2019-031367 (PMC7008422; doi:10.1136/bmjopen-2019-031367), 2019-12-23
Supplement: bmjopen-2019-031367supp002.pdf [file bmjopen-2019-031367supp002.pdf]

**SECCIÓN G: PUNTUACIONES GLOBALES****PUNTUACIONES GLOBALES SOBRE LA CALIDAD**

1. En general, ¿cómo puntuaría a su centro de salud en cada una de las siguientes dimensiones de la calidad asistencial?

|                                |                                                                                                                                          | Pobre                    | Regular                  | Bueno                    | Muy Bueno                | Excelente                |
|--------------------------------|------------------------------------------------------------------------------------------------------------------------------------------|--------------------------|--------------------------|--------------------------|--------------------------|--------------------------|
| <b>Centrado en el paciente</b> | Responde a las preferencias individuales de los pacientes, a sus necesidades y valores.                                                  | <input type="checkbox"/> |
| <b>Efectivo</b>                | Se basa en el conocimiento científico.                                                                                                   | <input type="checkbox"/> |
| <b>A tiempo</b>                | Minimiza esperas y demoras potencialmente perjudiciales.                                                                                 | <input type="checkbox"/> |
| <b>Eficiente</b>               | Garantiza unos cuidados coste-efectivos (evita el despilfarro, la sobreutilización, o el mal uso de los servicios).                      | <input type="checkbox"/> |
| <b>Equitativo</b>              | Ofrece la misma calidad asistencial a todos los individuos con independencia de su sexo, raza, etnia, nivel socioeconómico, idioma, etc. | <input type="checkbox"/> |

**PUNTUACIÓN GLOBAL EN SEGURIDAD DEL PACIENTE**

2. Globalmente, cómo puntúa el sistema y los procedimientos clínicos que su centro de salud ha puesto en marcha para prevenir, detectar, y corregir problemas que potencialmente pueden afectar a los pacientes:

| Pobre                    | Regular                  | Bueno                    | Muy Bueno                | Excelente                |
|--------------------------|--------------------------|--------------------------|--------------------------|--------------------------|
| <input type="checkbox"/> |

**SECCIÓN H: PREGUNTAS SOBRE SU TRABAJO EN EL CENTRO DE SALUD**

1. ¿Cuánto tiempo lleva trabajando en este centro de salud?

- ☐ Menos de dos meses      ☐ De un año a menos de tres años      ☐ De 6 años a menos de 11 años  
☐ De dos meses a menos de un año      ☐ De 3 años a menos de 6 años      ☐ De 11 años a menos de 20 años  
☐ Más de 20 años

2. Habitualmente, ¿cuántas horas trabaja en este centro de salud?

- ☐ De una a 4 horas por semana      ☐ De 17 a 24 horas por semana      ☐ De 33 a 40 horas por semana  
☐ De 5 a 16 horas por semana      ☐ De 25 a 32 horas por semana

3. ¿Qué puesto tiene en el centro de salud? Marque la categoría que mejor refleje su trabajo.

- ☐ Médico      ☐ MIR      ☐ Enfermera / Matrona  
☐ Gestores:      ☐ Coordinador médico  
                          ☐ Responsable del área administrativa  
                          ☐ Responsable de enfermería  
☐ Trabajador social  
☐ Administrativos y otro personal no sanitario  
☐ Otros profesionales sanitarios en el centro de salud:  
                          ☐ Auxiliar de enfermería      ☐ Fisioterapeuta (de todos los tipos)  
                          ☐ Odontólogos      ☐ Otros profesionales

4. ¿Qué nº de TIS tiene adscritas al cupo?

- ☐ <500      ☐ 500-1000      ☐ 1000-1500      ☐ 1500-2000      ☐ >2000

5. Edad

6. Sexo ☐ Varón ☐ Mujer

7. Situación laboral ☐ Fijo ☐ Interino ☐ Eventual

8. Turno de trabajo ☐ Sólo Mañana ☐ Sólo tarde ☐ Mañana y tarde

9. Realiza guardias ☐ Si ☐ No

**SECCIÓN I: SUS COMENTARIOS SOBRE LA SEGURIDAD DEL PACIENTE/CALIDAD DE LA ASISTENCIA EN SU CENTRO**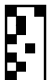

17936

**MUCHAS GRACIAS****CUESTIONARIO SOBRE SEGURIDAD DEL PACIENTE EN ATENCION PRIMARIA.**

VERSIÓN ESPAÑOLA MODIFICADA DEL MEDICAL OFFICE SURVEY ON PATIENT SAFETY CULTURE (MOSPS-AHRQ)

**INSTRUCCIONES PARA CUMPLIMENTAR LA ENCUESTA**

Por favor, piense en cómo se hacen las cosas en su **centro de salud/consultorio**.

El término **profesional sanitario** hace referencia a los médicos, enfermeras, residentes y otros: fisioterapeutas, auxiliares de enfermería, odontólogos, etc.

El término **personal no sanitario** hace referencia al resto de trabajadores del centro (administrativos, trabajadores sociales...). El término **personal o equipo** hace referencia al conjunto de las personas que trabajan en el centro de salud.

Si alguna pregunta no le afecta o no sabe responder, por favor, marque "No lo sé/ No procede".

Si usted trabaja en más de una consulta, responda atendiendo únicamente a los hechos del lugar donde pasa la consulta la mayor parte del tiempo.

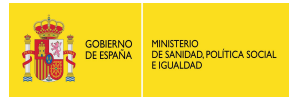**SECCIÓN A: LISTADO DE ASPECTOS RELACIONADOS CON LA SEGURIDAD DEL PACIENTE Y LA CALIDAD**

Los siguientes enunciados describen hechos que pueden ocurrir en el día a día del centro de salud/consultorio y que afectan a la seguridad de los pacientes y a la calidad asistencial. En su opinión, ¿con qué frecuencia han ocurrido los siguientes hechos en su centro de salud/consultorio en los últimos doce meses?

|                                                                                                              | Diariamente              | Semanalmente             | Mensualmente             | Varias veces en los últimos 12 meses | Una o dos veces en los últimos 12 meses | Ninguna vez en los últimos 12 meses | No lo sé/ No procede     |
|--------------------------------------------------------------------------------------------------------------|--------------------------|--------------------------|--------------------------|--------------------------------------|-----------------------------------------|-------------------------------------|--------------------------|
| <b>Acceso a la atención sanitaria</b>                                                                        |                          |                          |                          |                                      |                                         |                                     |                          |
| 1. El paciente no consiguió una cita para consultar un problema de salud agudo en las siguientes 48h.        | <input type="checkbox"/> | <input type="checkbox"/> | <input type="checkbox"/> | <input type="checkbox"/>             | <input type="checkbox"/>                | <input type="checkbox"/>            | <input type="checkbox"/> |
| <b>Identificación del paciente</b>                                                                           |                          |                          |                          |                                      |                                         |                                     |                          |
| 2. Se utilizó la historia clínica de otro paciente.                                                          | <input type="checkbox"/> | <input type="checkbox"/> | <input type="checkbox"/> | <input type="checkbox"/>             | <input type="checkbox"/>                | <input type="checkbox"/>            | <input type="checkbox"/> |
| <b>Historias clínicas</b>                                                                                    |                          |                          |                          |                                      |                                         |                                     |                          |
| 3. La historia clínica del paciente no estaba disponible cuando se precisó.                                  | <input type="checkbox"/> | <input type="checkbox"/> | <input type="checkbox"/> | <input type="checkbox"/>             | <input type="checkbox"/>                | <input type="checkbox"/>            | <input type="checkbox"/> |
| 4. La información clínica se archivó en la historia clínica de otro paciente.                                | <input type="checkbox"/> | <input type="checkbox"/> | <input type="checkbox"/> | <input type="checkbox"/>             | <input type="checkbox"/>                | <input type="checkbox"/>            | <input type="checkbox"/> |
| <b>Equipamiento médico</b>                                                                                   |                          |                          |                          |                                      |                                         |                                     |                          |
| 5. El equipamiento médico no funcionó adecuadamente, precisaba reparación o sustitución.                     | <input type="checkbox"/> | <input type="checkbox"/> | <input type="checkbox"/> | <input type="checkbox"/>             | <input type="checkbox"/>                | <input type="checkbox"/>            | <input type="checkbox"/> |
| <b>Medicación</b>                                                                                            |                          |                          |                          |                                      |                                         |                                     |                          |
| 6. Una oficina de farmacia contactó con el centro o la consulta para clarificar o corregir una prescripción. | <input type="checkbox"/> | <input type="checkbox"/> | <input type="checkbox"/> | <input type="checkbox"/>             | <input type="checkbox"/>                | <input type="checkbox"/>            | <input type="checkbox"/> |
| 7. La lista de medicación del paciente no se supervisó durante la consulta.                                  | <input type="checkbox"/> | <input type="checkbox"/> | <input type="checkbox"/> | <input type="checkbox"/>             | <input type="checkbox"/>                | <input type="checkbox"/>            | <input type="checkbox"/> |
| <b>Diagnósticos y pruebas complementarias</b>                                                                |                          |                          |                          |                                      |                                         |                                     |                          |
| 8. Los resultados de algunas pruebas de laboratorio o de imagen no estaban disponibles cuando se precisaron. | <input type="checkbox"/> | <input type="checkbox"/> | <input type="checkbox"/> | <input type="checkbox"/>             | <input type="checkbox"/>                | <input type="checkbox"/>            | <input type="checkbox"/> |
| 9. Un resultado crítico anormal en alguna prueba de laboratorio o de imagen no fue supervisado en el día.    | <input type="checkbox"/> | <input type="checkbox"/> | <input type="checkbox"/> | <input type="checkbox"/>             | <input type="checkbox"/>                | <input type="checkbox"/>            | <input type="checkbox"/> |

**SECCIÓN B: INTERCAMBIO DE INFORMACIÓN CON OTROS DISPOSITIVOS ASISTENCIALES**

En los últimos 12 meses, ¿con qué frecuencia ha tenido problemas en su centro para intercambiar información precisa, completa, adecuada y oportuna, con cada uno de los siguientes dispositivos asistenciales?

|                                                                                                          | Diariamente              | Semanalmente             | Mensualmente             | Varias veces en los últimos 12 meses | Una o dos veces en los últimos 12 meses | Ninguna vez en los últimos 12 meses | No lo sé/ No procede     |
|----------------------------------------------------------------------------------------------------------|--------------------------|--------------------------|--------------------------|--------------------------------------|-----------------------------------------|-------------------------------------|--------------------------|
| 1. Problemas con servicios externos de pruebas complementarias (laboratorio, diagnóstico por imagen...). | <input type="checkbox"/> | <input type="checkbox"/> | <input type="checkbox"/> | <input type="checkbox"/>             | <input type="checkbox"/>                | <input type="checkbox"/>            | <input type="checkbox"/> |
| 2. Problemas con otras consultas médicas fuera del centro.                                               | <input type="checkbox"/> | <input type="checkbox"/> | <input type="checkbox"/> | <input type="checkbox"/>             | <input type="checkbox"/>                | <input type="checkbox"/>            | <input type="checkbox"/> |
| 3. Problemas con oficinas de farmacia.                                                                   | <input type="checkbox"/> | <input type="checkbox"/> | <input type="checkbox"/> | <input type="checkbox"/>             | <input type="checkbox"/>                | <input type="checkbox"/>            | <input type="checkbox"/> |
| 4. Problemas con hospitales.                                                                             | <input type="checkbox"/> | <input type="checkbox"/> | <input type="checkbox"/> | <input type="checkbox"/>             | <input type="checkbox"/>                | <input type="checkbox"/>            | <input type="checkbox"/> |

**SECCIÓN C: TRABAJANDO EN EL CENTRO DE SALUD****¿Cuál es su grado de acuerdo con los siguientes enunciados?:**

|                                                                                                                        | Muy en desacuerdo        | En desacuerdo            | Ni de acuerdo, ni en desacuerdo | De acuerdo               | Muy de acuerdo           | No lo sé/ No procede     |
|------------------------------------------------------------------------------------------------------------------------|--------------------------|--------------------------|---------------------------------|--------------------------|--------------------------|--------------------------|
| 1. Cuando alguien tiene excesivo trabajo los compañeros le ayudan.                                                     | <input type="checkbox"/> | <input type="checkbox"/> | <input type="checkbox"/>        | <input type="checkbox"/> | <input type="checkbox"/> | <input type="checkbox"/> |
| 2. En este centro hay un buen ambiente de trabajo entre los componentes del equipo.                                    | <input type="checkbox"/> | <input type="checkbox"/> | <input type="checkbox"/>        | <input type="checkbox"/> | <input type="checkbox"/> | <input type="checkbox"/> |
| 3. En este centro, sentimos que atendemos con prisas a los pacientes.                                                  | <input type="checkbox"/> | <input type="checkbox"/> | <input type="checkbox"/>        | <input type="checkbox"/> | <input type="checkbox"/> | <input type="checkbox"/> |
| 4. Este centro forma a su personal <b>no</b> sanitario en los nuevos procedimientos de trabajo que se ponen en marcha. | <input type="checkbox"/> | <input type="checkbox"/> | <input type="checkbox"/>        | <input type="checkbox"/> | <input type="checkbox"/> | <input type="checkbox"/> |
| 5. En este centro, nos tratamos mutuamente con respeto.                                                                | <input type="checkbox"/> | <input type="checkbox"/> | <input type="checkbox"/>        | <input type="checkbox"/> | <input type="checkbox"/> | <input type="checkbox"/> |
| 6. Tenemos demasiados pacientes asignados para el número de profesionales sanitarios que tiene el centro.              | <input type="checkbox"/> | <input type="checkbox"/> | <input type="checkbox"/>        | <input type="checkbox"/> | <input type="checkbox"/> | <input type="checkbox"/> |
| 7. En este centro se asegura que el personal <b>no</b> sanitario tenga la formación necesaria para su trabajo.         | <input type="checkbox"/> | <input type="checkbox"/> | <input type="checkbox"/>        | <input type="checkbox"/> | <input type="checkbox"/> | <input type="checkbox"/> |
| 8. Este centro está más desorganizado de lo que debiera.                                                               | <input type="checkbox"/> | <input type="checkbox"/> | <input type="checkbox"/>        | <input type="checkbox"/> | <input type="checkbox"/> | <input type="checkbox"/> |
| 9. Tenemos procedimientos adecuados para evaluar que el trabajo en el centro se ha realizado correctamente.            | <input type="checkbox"/> | <input type="checkbox"/> | <input type="checkbox"/>        | <input type="checkbox"/> | <input type="checkbox"/> | <input type="checkbox"/> |
| 10. Al personal <b>no</b> sanitario se le pide realizar tareas para las que no ha sido formado.                        | <input type="checkbox"/> | <input type="checkbox"/> | <input type="checkbox"/>        | <input type="checkbox"/> | <input type="checkbox"/> | <input type="checkbox"/> |
| 11. Tenemos suficiente personal <b>no</b> sanitario para manejar la carga de trabajo de los pacientes.                 | <input type="checkbox"/> | <input type="checkbox"/> | <input type="checkbox"/>        | <input type="checkbox"/> | <input type="checkbox"/> | <input type="checkbox"/> |
| 12. En este centro tenemos problemas con la organización y distribución del trabajo.                                   | <input type="checkbox"/> | <input type="checkbox"/> | <input type="checkbox"/>        | <input type="checkbox"/> | <input type="checkbox"/> | <input type="checkbox"/> |
| 13. Este centro promueve el trabajo en equipo para el cuidado de los pacientes.                                        | <input type="checkbox"/> | <input type="checkbox"/> | <input type="checkbox"/>        | <input type="checkbox"/> | <input type="checkbox"/> | <input type="checkbox"/> |
| 14. Este centro tiene demasiados pacientes para hacer frente a todo de forma eficiente.                                | <input type="checkbox"/> | <input type="checkbox"/> | <input type="checkbox"/>        | <input type="checkbox"/> | <input type="checkbox"/> | <input type="checkbox"/> |
| 15. El personal <b>no</b> sanitario del centro realiza sus tareas según los procedimientos que tienen establecidos.    | <input type="checkbox"/> | <input type="checkbox"/> | <input type="checkbox"/>        | <input type="checkbox"/> | <input type="checkbox"/> | <input type="checkbox"/> |
| 16. Este centro forma a su personal sanitario en los nuevos procedimientos de trabajo que se ponen en marcha.          | <input type="checkbox"/> | <input type="checkbox"/> | <input type="checkbox"/>        | <input type="checkbox"/> | <input type="checkbox"/> | <input type="checkbox"/> |
| 17. En este centro se asegura que el personal sanitario tenga la formación necesaria para su trabajo.                  | <input type="checkbox"/> | <input type="checkbox"/> | <input type="checkbox"/>        | <input type="checkbox"/> | <input type="checkbox"/> | <input type="checkbox"/> |
| 18. Al personal sanitario se le pide realizar tareas para las que no ha sido formado.                                  | <input type="checkbox"/> | <input type="checkbox"/> | <input type="checkbox"/>        | <input type="checkbox"/> | <input type="checkbox"/> | <input type="checkbox"/> |
| 19. El personal sanitario del centro realiza sus tareas según los procedimientos que tienen establecidos.              | <input type="checkbox"/> | <input type="checkbox"/> | <input type="checkbox"/>        | <input type="checkbox"/> | <input type="checkbox"/> | <input type="checkbox"/> |

**SECCIÓN D: COMUNICACIÓN Y SEGUIMIENTO****¿Con qué frecuencia ocurren las siguientes situaciones en tu Centro de Salud?**

|                                                                                                                   | Nunca                    | Rara vez                 | A veces                  | La mayoría de las veces  | Siempre                  | No lo sé/ No procede     |
|-------------------------------------------------------------------------------------------------------------------|--------------------------|--------------------------|--------------------------|--------------------------|--------------------------|--------------------------|
| 1. Los profesionales sanitarios del centro son receptivos a las propuestas de mejora de los <b>no</b> sanitarios. | <input type="checkbox"/> |
| 2. En este centro, se anima al personal <b>no</b> sanitario a expresar puntos de vista alternativos.              | <input type="checkbox"/> |
| 3. El centro recuerda a sus pacientes cuándo deben citarse para revisiones o para actividades preventivas.        | <input type="checkbox"/> |
| 4. El personal <b>no</b> sanitario teme hacer preguntas cuando algo parece que no está bien.                      | <input type="checkbox"/> |
| 5. En este centro se registra si nuestros pacientes crónicos siguen bien su plan de tratamiento.                  | <input type="checkbox"/> |

|                                                                                                                                                                   | Nunca                    | Rara vez                 | A veces                  | La mayoría de las veces  | Siempre                  | No lo sé/ No procede     |
|-------------------------------------------------------------------------------------------------------------------------------------------------------------------|--------------------------|--------------------------|--------------------------|--------------------------|--------------------------|--------------------------|
| 6. En nuestro centro se realiza un seguimiento cuando no se recibe el informe de un paciente que estamos esperando que nos remita un especialista de otro centro. | <input type="checkbox"/> |
| 7. El personal <b>no</b> sanitario siente que sus errores son utilizados en su contra.                                                                            | <input type="checkbox"/> |
| 8. Todo el equipo habla abiertamente de los problemas del centro.                                                                                                 | <input type="checkbox"/> |
| 9. En este centro se hacen revisiones a los pacientes que precisan un seguimiento.                                                                                | <input type="checkbox"/> |
| 10. Es difícil expresar libremente cualquier desacuerdo en este centro.                                                                                           | <input type="checkbox"/> |
| 11. En este centro, buscamos la manera de prevenir los errores para que no vuelvan a ocurrir.                                                                     | <input type="checkbox"/> |
| 12. El personal <b>no</b> sanitario está dispuesto a notificar fallos que observan en el centro.                                                                  | <input type="checkbox"/> |
| 13. El personal sanitario siente que sus errores son utilizados en su contra.                                                                                     | <input type="checkbox"/> |
| 14. El personal sanitario está dispuesto a notificar fallos que observan en el centro.                                                                            | <input type="checkbox"/> |

**SECCIÓN E: APOYO DE LOS LÍDERES**

1. ¿Está usted en una posición de liderazgo con responsabilidad para tomar decisiones en la gestión de los recursos de su centro de salud? (coordinador médico, responsable de enfermería, responsable administrativo).

☐ **SÍ** (continúe en la sección F) ☐ **NO** (responda a las preguntas de la 1 a la 4 que se muestran a continuación y luego prosiga el cuestionario en la sección F)

**¿Cuál es su grado de acuerdo con los siguientes enunciados?:**

|                                                                                                                                                      | Muy en desacuerdo        | En desacuerdo            | Ni de acuerdo, ni en desacuerdo | De acuerdo               | Muy de acuerdo           | No lo sé/ No procede     |
|------------------------------------------------------------------------------------------------------------------------------------------------------|--------------------------|--------------------------|---------------------------------|--------------------------|--------------------------|--------------------------|
| 1. Los responsables de su centro no están invirtiendo suficientes recursos para mejorar la calidad asistencial en este centro de salud.              | <input type="checkbox"/> | <input type="checkbox"/> | <input type="checkbox"/>        | <input type="checkbox"/> | <input type="checkbox"/> | <input type="checkbox"/> |
| 2. Los responsables de su centro pasan por alto los fallos relacionados con la asistencia que ocurren una y otra vez.                                | <input type="checkbox"/> | <input type="checkbox"/> | <input type="checkbox"/>        | <input type="checkbox"/> | <input type="checkbox"/> | <input type="checkbox"/> |
| 3. Los responsables de su centro dan prioridad a los procesos relacionados con la mejora de la atención a los pacientes.                             | <input type="checkbox"/> | <input type="checkbox"/> | <input type="checkbox"/>        | <input type="checkbox"/> | <input type="checkbox"/> | <input type="checkbox"/> |
| 4. Los responsables de su centro a menudo toman decisiones basadas en lo que es mejor para el centro en lugar de lo que es mejor para los pacientes. | <input type="checkbox"/> | <input type="checkbox"/> | <input type="checkbox"/>        | <input type="checkbox"/> | <input type="checkbox"/> | <input type="checkbox"/> |

**SECCIÓN F: EN EL CENTRO****¿Cuál es su grado de acuerdo con los siguientes enunciados?:**

|                                                                                                                   | Muy en desacuerdo        | En desacuerdo            | Ni de acuerdo, ni en desacuerdo | De acuerdo               | Muy de acuerdo           | No lo sé/ No procede     |
|-------------------------------------------------------------------------------------------------------------------|--------------------------|--------------------------|---------------------------------|--------------------------|--------------------------|--------------------------|
| 1. Cuando hay un problema en nuestro centro, valoramos si necesitamos cambiar la manera en que hacemos las cosas. | <input type="checkbox"/> | <input type="checkbox"/> | <input type="checkbox"/>        | <input type="checkbox"/> | <input type="checkbox"/> | <input type="checkbox"/> |
| 2. Los procesos de nuestro centro son buenos para prevenir fallos que pueden afectar a los pacientes.             | <input type="checkbox"/> | <input type="checkbox"/> | <input type="checkbox"/>        | <input type="checkbox"/> | <input type="checkbox"/> | <input type="checkbox"/> |
| 3. En este centro se producen fallos con más frecuencia de lo que debieran.                                       | <input type="checkbox"/> | <input type="checkbox"/> | <input type="checkbox"/>        | <input type="checkbox"/> | <input type="checkbox"/> | <input type="checkbox"/> |
| 4. Si no cometemos más fallos que afecten a nuestros pacientes, es por casualidad.                                | <input type="checkbox"/> | <input type="checkbox"/> | <input type="checkbox"/>        | <input type="checkbox"/> | <input type="checkbox"/> | <input type="checkbox"/> |
| 5. Este centro modifica sus procesos para garantizar que los mismos problemas no vuelvan a ocurrir.               | <input type="checkbox"/> | <input type="checkbox"/> | <input type="checkbox"/>        | <input type="checkbox"/> | <input type="checkbox"/> | <input type="checkbox"/> |
| 6. En este centro, es más importante realizar más trabajo que la calidad de la atención.                          | <input type="checkbox"/> | <input type="checkbox"/> | <input type="checkbox"/>        | <input type="checkbox"/> | <input type="checkbox"/> | <input type="checkbox"/> |
| 7. Después de introducir cambios para mejorar la asistencia, comprobamos si funcionan.                            | <input type="checkbox"/> | <input type="checkbox"/> | <input type="checkbox"/>        | <input type="checkbox"/> | <input type="checkbox"/> | <input type="checkbox"/> |
